# Supplementary material
Source: PubMed Central journal article supplement (PMC7416504)
Supplement: NIHMS1558810-supplement-Supplementary_Material.pdf [file NIHMS1558810-supplement-Supplementary_Material.pdf]

SUPPLEMENTAL MATERIAL

**SUPPLEMENTAL MATERIAL**

Parenting Skill Utilization Diary (PSUD)

1. Which of these behaviors did your child do today?

- Annoyed others
- Argued
- Bullied or fought
- Destroyed property
- Did something helpful
- Followed directions
- Hit, kicked, or bit
- Lied
- Said something nice
- Shared
- Stole
- Swore
- Talked back
- Threw a temper tantrum
- Was defiant or oppositional
- Was kind
- None of these behaviors

For each **negative** behavior selected in question 1, the following question is asked:

2a. Pick the most recent time your child (*insert selected behavior*) today and report which strategies you used to address this behavior.

- Ignoring
- Time-out (how long was child in time-out?) \_\_\_\_\_
- Natural consequence (what was the consequence?) \_\_\_\_\_
- Loss-of-privilege (what privilege was taken away?) \_\_\_\_\_
- Logical consequence (what was the consequence?) \_\_\_\_\_
- Other strategy \_\_\_\_\_
- None of these strategies

For each **positive** behavior selected in question 1, the following question is asked:

2b. Pick the most recent time your child (*insert selected behavior*) today and report which strategies you used to address this behavior.

- Reward (what was the reward?) \_\_\_\_\_
- Praise (what did you say?) \_\_\_\_\_
- Point system
- Other strategy \_\_\_\_\_
- None of these strategies

Can't read this email? [Click here to view a desktop version.](#)

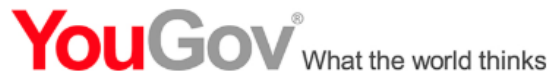

Hi \$InvitationName,

You recently completed a survey about children's behaviors and parent-child interactions. You have been selected to share your opinion in a series of very short follow-up surveys regarding the same topic.

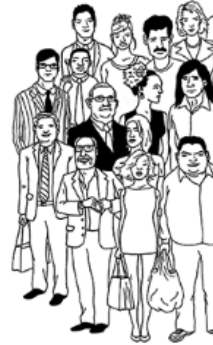

**You will receive a survey invitation once a day for 7 days.** Each survey should only take 2-3 minutes to complete. **This survey will only be available until 12pm tomorrow**, so please be sure to complete this survey before then.

Your participation is very important to the success of this research study. As a thank you for your time, you will be awarded **500 points** upon completion of each survey. **If you complete all 7 days, you will receive a \$25 Amazon gift card.**

[Start Now](#)

If you cannot view or click on the button above, please copy and paste this address into your browser in order to complete the Day 1 Survey:

[\\$SurveyLink](#)

Thank you for being an active member of the YouGov community! **Please be on the lookout for the Day 2 Survey invitation at 5pm tomorrow.**

Kelly Connor  
YouGov

For more information on YouGov visit <http://today.yougov.com>. If you have any questions please read our [membership rules](#) and [Privacy Policy](#).

To ensure reliable delivery please add [help.us@yougov.com](mailto:help.us@yougov.com) to your address book.

This email was intended for \$Email. YouGov does not send unsolicited emails. You received this message because you signed up to receive polls from us.

If you received this message in error or no longer wish to participate, please use the following link to unsubscribe: [https://survey-us.yougov.com/unsubscribe/\\$msgid](https://survey-us.yougov.com/unsubscribe/$msgid)

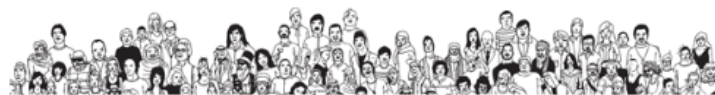

E [help.us@yougov.com](mailto:help.us@yougov.com) W [yougov.com](http://yougov.com)

If you don't want to receive these emails, you can unsubscribe at any time.
